# Supplementary material
Source: bioRxiv or medRxiv preprint supplement (https://www.biorxiv.org/highwire/filestream/52042/field_highwire_adjunct_files/0/174102-1.pdf)
Supplement: Supplementary file [file 174102-1.pdf]

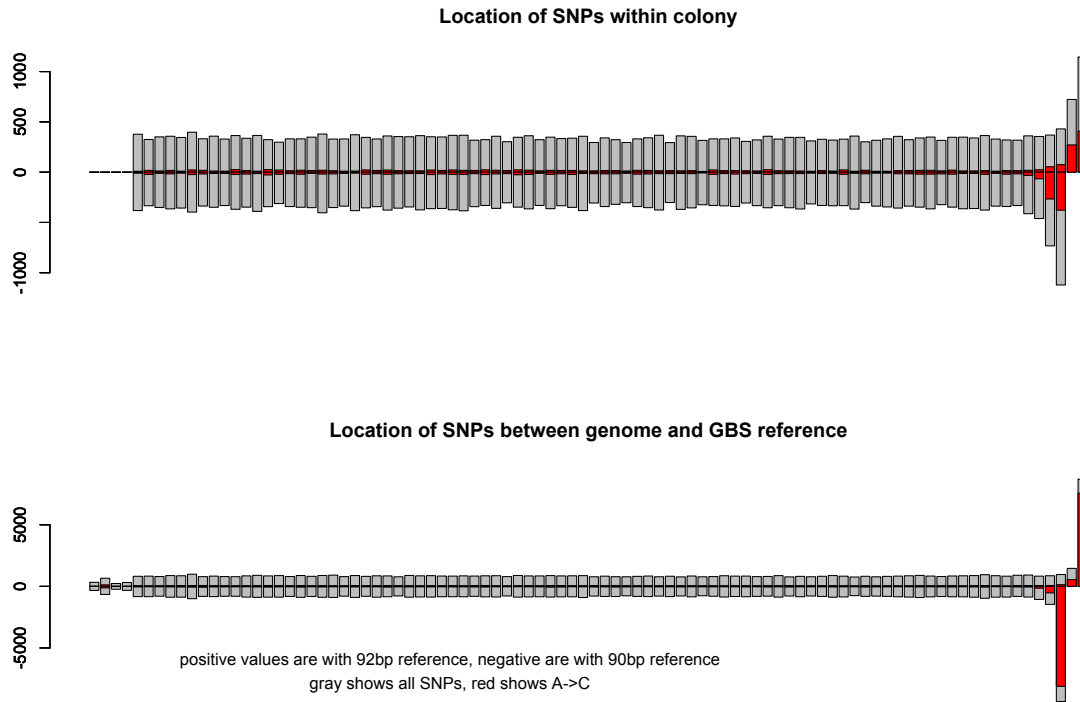

1

2

### 3 Supplemental Figure 1. SNP Profiles

4

5

6

7

8

All of the entries in the reference we extracted from the STACKs pipeline are 92 bases long. This histogram shows the number of SNPs per base position within the animals we sequenced (top panel) and when compared with the Lucigen genome (bottom panel). The final two bases show unusually high numbers of SNPs in both cases, and especially high numbers of A to C transversions (red).

9

10

11

12

13

14

We found that these excess SNPs are always associated with a restriction cutsite. And specifically, they are associated with regions where the cutsite is within two bases from the end of the reference. That is, all the spurious cases ended with either CGWCX or CGWCXX where 'X' represents the SNP and CGWC is the restriction recognition sequence. Given the way in which GBS libraries are made, we believe that these SNPs may be part of the barcode and/or Illumina adapter sequence that was too short to be recognized and trimmed by BGI.

15           Our first attempt to deal with this issue was by cropping the reads entering the  
16 STACKs pipeline to 90 bases as we expected that would remove the short bits of adapter that  
17 remained. We tested this by re-running the STACKs pipeline using the new 90bp reference.  
18 Unfortunately, the issue was not resolved (see the negative values in both panels above). We  
19 found that the easiest way to remove these tailing SNPs was to use the 92bp reference, but  
20 blacklist the final two bases from the analyses of diversity (this was implemented in the  
21 populations script through a whitelist of SNPs in the first 90 bases rather than a blacklist of  
22 SNPs in the final 2 bases because populations does not allow SNP-specific blacklists).

23

24           Despite our solution, the question remained: Why do we find elevated substitution  
25 rates near the ends of the reads regardless of the length of the read? We think the answer lies  
26 in the fact that alignments only allow so many mismatches. For example, there are reads that  
27 have a cutsite four bases from the end of the read (CGWCXXXX), but four mismatched  
28 bases is too many to form an alignment (the tailing bases would be soft-clipped rather than  
29 aligned as a mismatch) and so these were never analyzed for SNPs (we counted SNPs only in  
30 alignments without any clipping). When we later trimmed the tailing two bases off, these  
31 cases now had only two mismatches in the alignment, and so passed the alignment-length  
32 filter, and the mismatches were identified as SNPs. As cutsites do occur randomly in the  
33 genome, it does not matter if we crop two or ten bases from the raw reads, a cutsite would  
34 still lie within two bases on some reference somewhere. The best way perhaps to solve the  
35 issue would be to do a thorough bout of adapter trimming followed by cropping five to six  
36 bases. Unfortunately, we had the libraries built and sequenced by BGI who used proprietary  
37 barcodes and adapter sequences. As they were unwilling to share these sequences with us,  
38 further cleaning of the reads was not possible and the blacklisting approach that we used  
39 seems best.
